# Supplementary material for: Stand Development Stages Reshape Climate-Structure Interactions in Boreal Forest Productivity: A Case Study of China's Cold-Temperate Conifers
Source: Research Square preprint supplement (doi:10.21203/rs.3.rs-6728635/v1), 2025-06-10

S1 The variance inflation factor (VIF) of the independent variables

| Climate | | Stand | | Soil | | Structure diversity | | Topography | |
| --- | --- | --- | --- | --- | --- | --- | --- | --- | --- |
| Variables | VIF | Variables | VIF | Variables | VIF | Variables | VIF | Variables | VIF |
| MAT | 1.44 | Age | 1.82 | DEPTH | 1.18 | ISCD | 1.06 | Altitude | 3.25 |
| MWMT | / | Dg | 3.12 | REF_BULK_DENSITY | 3.52 |  |  | Aspect | 1.09 |
| MCMT | / | Density | 2.06 | OC | 2.32 |  |  | Slope | 1.29 |
| TD | / |  |  | PH_H2O | 12.66 |  |  |  |  |
| MAP | 1.14 |  |  | CEC_SOIL | 2.81 |  |  |  |  |
| AHM | 29.46 |  |  | BS | 4.98 |  |  |  |  |
| DD_0 | / |  |  | TEB | 3.01 |  |  |  |  |
| DD5 | / |  |  | CACO3 | 5.91 |  |  |  |  |
| DD18 | / |  |  | ESP | 1.67 |  |  |  |  |
| NFFD | / |  |  | ECE | 2.10 |  |  |  |  |
| PAS | 12.72 |  |  |  |  |  |  |  |  |
| EMT | 64.73 |  |  |  |  |  |  |  |  |
| EXT | 68.50 |  |  |  |  |  |  |  |  |
| EREF | 15.22 |  |  |  |  |  |  |  |  |
| CMD | 12.24 |  |  |  |  |  |  |  |  |
| RH | 39.98 |  |  |  |  |  |  |  |  |

S2 The variance Pearson of the independent variables

| Climate | | Stand | | Soil | | Structure diversity | | Topography | |
| --- | --- | --- | --- | --- | --- | --- | --- | --- | --- |
| Variables | Pearson | Variables | Pearson | Variables | Pearson | Variables | Pearson | Variables | Pearson |
| MAT | .316** | Age | .283** | DEPTH | 0.251** | ISCD | -.225** | Altitude | -.221** |
| MWMT | .316** | Dg | .258** | REF_BULK_DENSITY | -0.02 |  |  | Aspect | 0.026 |
| MCMT | .189** | Density | .362** | OC | -0.013 |  |  | Slope | -.158** |
| TD | 0 |  |  | PH_H2O | -0.049 |  |  |  |  |
| MAP | .273** |  |  | CEC_SOIL | -0.01 |  |  |  |  |
| AHM | .304** |  |  | BS | -0.027 |  |  |  |  |
| DD_0 | -.246** |  |  | TEB | -0.012 |  |  |  |  |
| DD5 | .308** |  |  | CACO3 | -0.042 |  |  |  |  |
| DD18 | -.272** |  |  | ESP | 0.02 |  |  |  |  |
| NFFD | .288** |  |  | ECE | 0.021 |  |  |  |  |
| PAS | .292** |  |  |  |  |  |  |  |  |
| EMT | -.122** |  |  |  |  |  |  |  |  |
| EXT | .199** |  |  |  |  |  |  |  |  |
| EREF | .320** |  |  |  |  |  |  |  |  |
| CMD | .187** |  |  |  |  |  |  |  |  |
| RH | .245** |  |  |  |  |  |  |  |  |

S3 Factor load of each measurement index in PLS-SEM

| Age group | Climate | | Stand | | | Soil | Structure diversity | Topography |
| --- | --- | --- | --- | --- | --- | --- | --- | --- |
| MAP | MAT | Age | Dg | Density | DEPTH | ISCD | Altitude |
| Young stand | 0.9973 | 0.1328 | -0.3308 | 0.3345 | 0.3394 | 1.0000 | 1.0000 | 1.0000 |
| Middle-age stand | 0.9811 | -0.0498 | -0.3262 | 0.3351 | 0.3432 | 1.0000 | 1.0000 | 1.0000 |
| Near-mature stand | 0.9009 | -0.1933 | -0.3328 | 0.3349 | 0.3398 | 1.0000 | 1.0000 | 1.0000 |
| Mature stand | 0.8563 | -0.2299 | -0.3316 | 0.3352 | 0.3387 | 1.0000 | 1.0000 | 1.0000 |
| Over-mature stand | 0.8539 | -0.2142 | -0.3419 | 0.3281 | 0.3357 | 1.0000 | 1.0000 | 1.0000 |

Young forest：


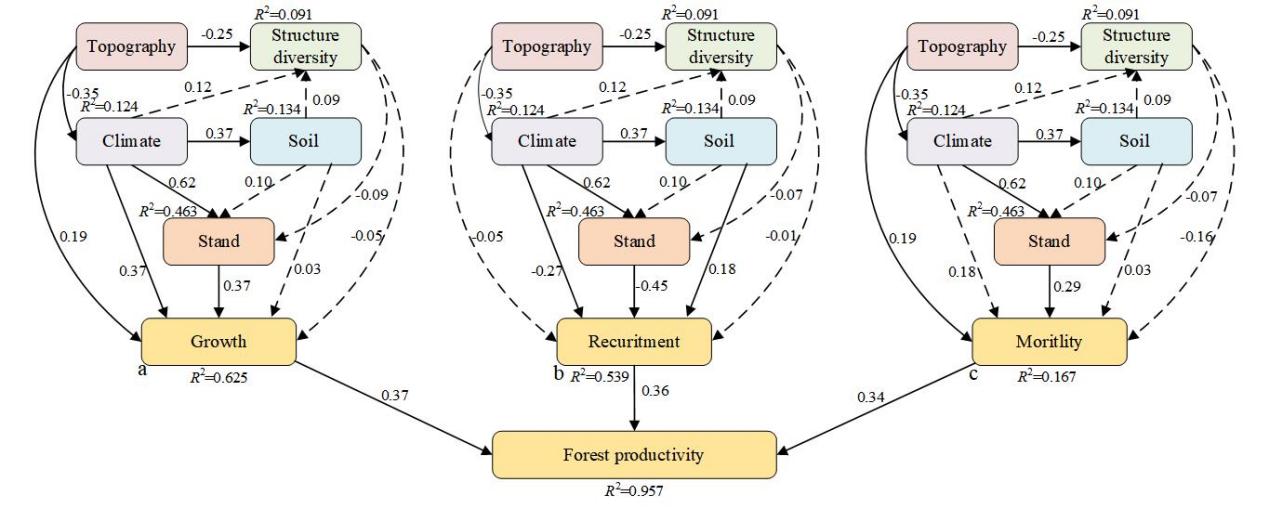


Middle-aged forest：


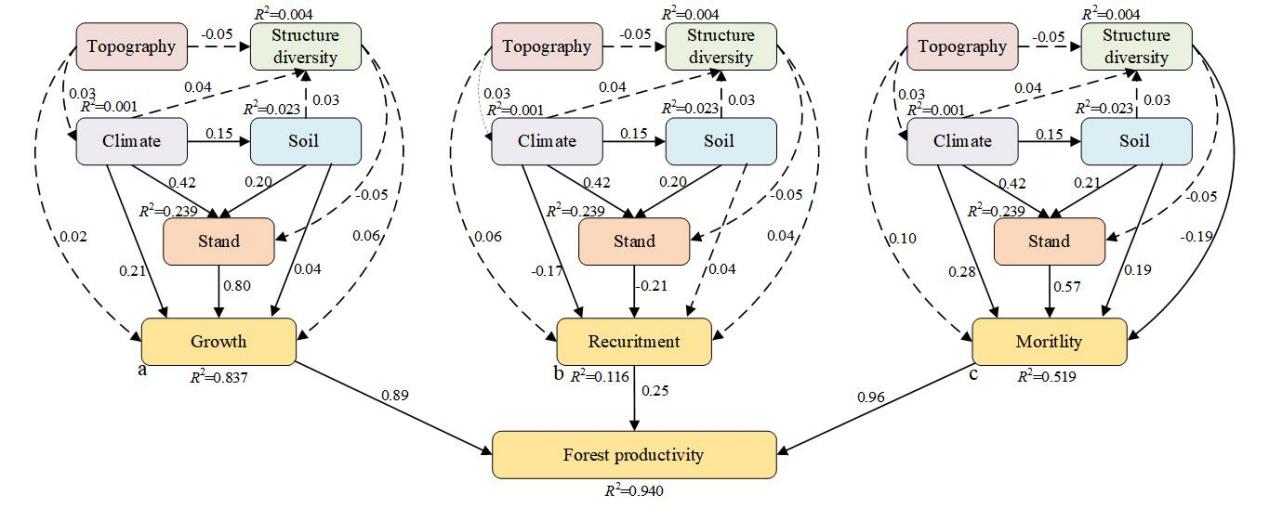


Near-aged forest：


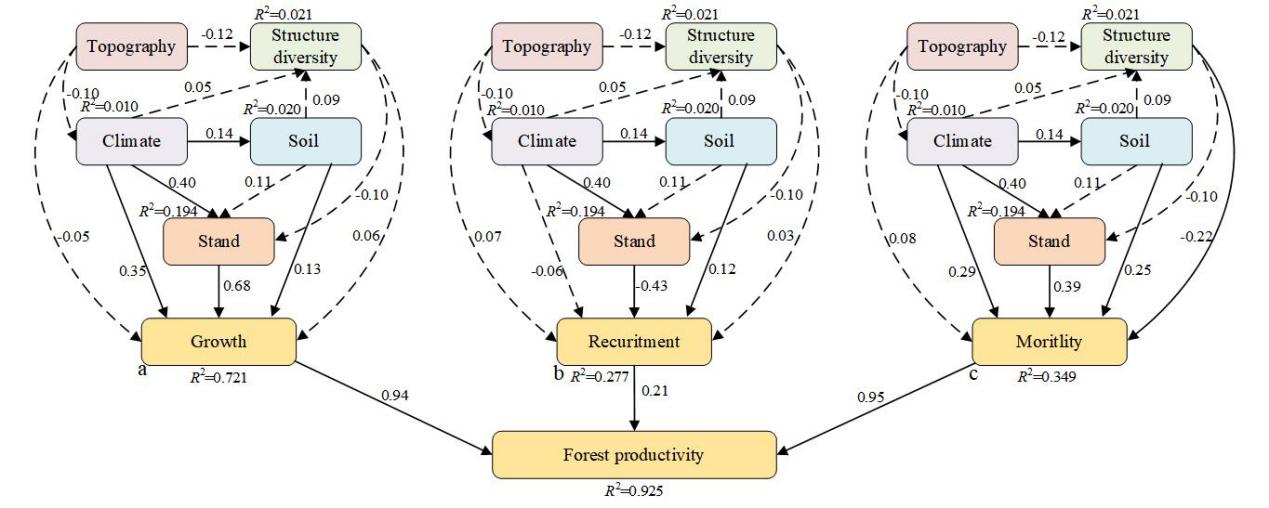


Mature forest：


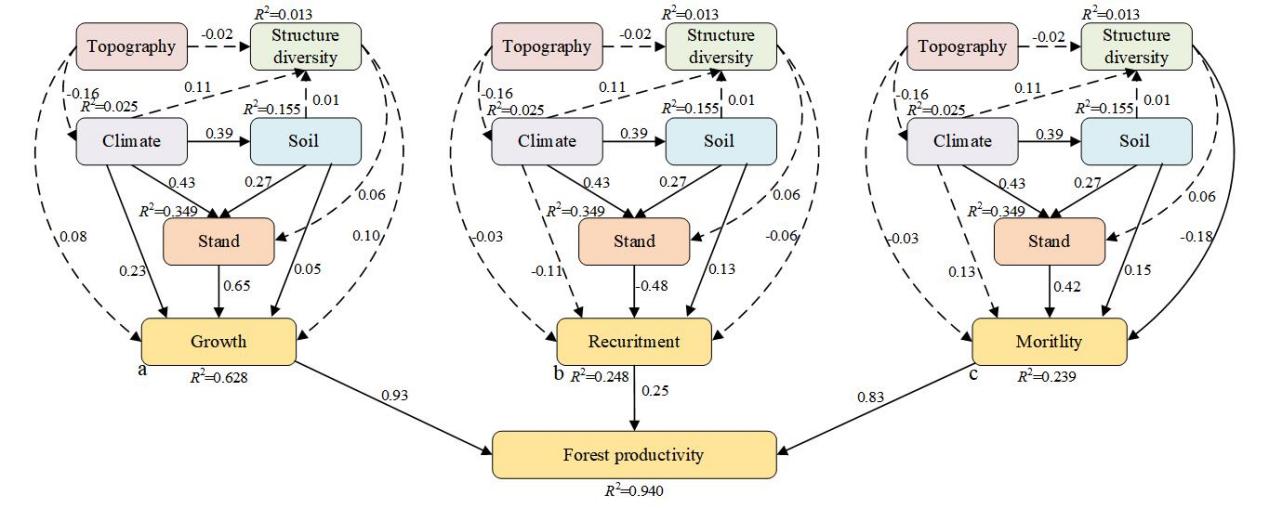


Overaged forest：


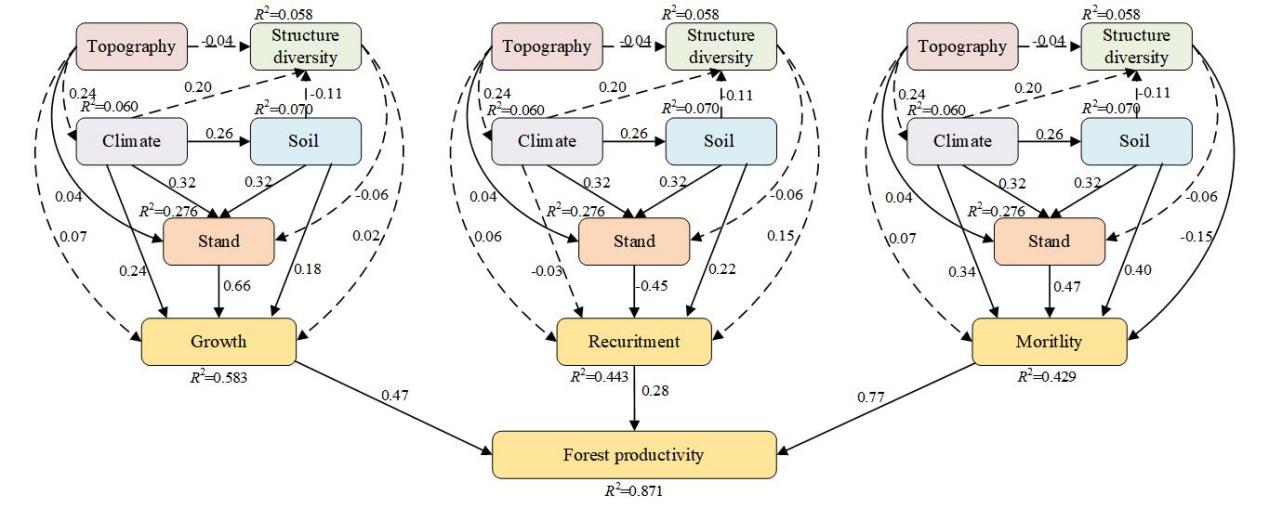

Supplement: Supplementary file 1 [file c7fb8b9ff8efbe14309784fd.docx]
